# Supplementary material for: Increased autophagy and apoptosis contribute to muscle atrophy in a myotonic dystrophy type 1 Drosophila model
Source: Oxford University Press journal article supplement (doi:10.1242/dmm.018127), 2015-06-18
Supplement: dmm018127supp.pdf [file dmm018127supp.pdf]

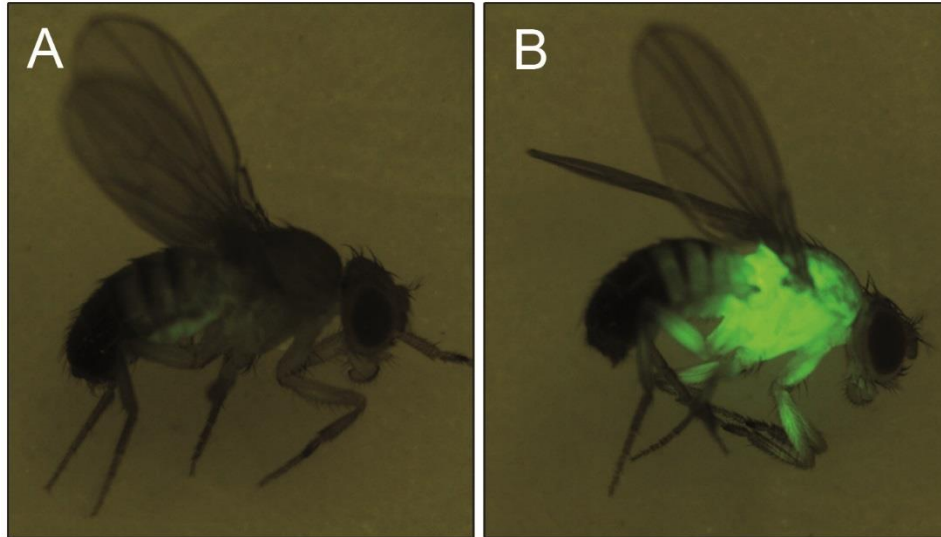

**Figure S1. GFP reporter is expressed after heat-shock induction.** Fluorescence dissecting microscope images of model flies (*hs-Gal4 UAS-i(CTG)480>UAS-GFP*) show strong fluorescence when transgene expression was induced (A) in comparison to uninduced counterparts (B).

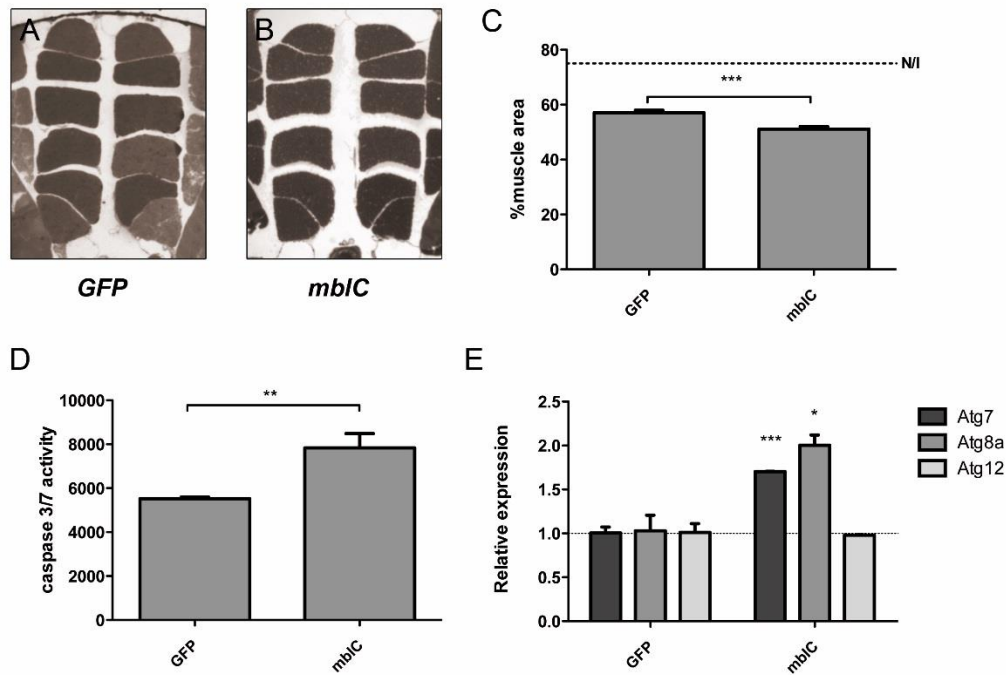

**Figure S2. *mbIC* overexpression induces muscle atrophy.** (A-B) Representative sections of resin-embedded thoraces of flies overexpressing the reporter GFP (A) or *mbIC* (B) under the control of the *hs-Gal4* driver. (C,D) Quantification of the mean percentage of muscle area per genotype indicates that *mbIC* overexpression induces both loss of muscle area, as well as the activation of caspase 3/7 activity. (E) Analysis of expression levels of *Atg7*, *Atg8a* and *Atg12* showed an increased expression of *Atg7* and *Atg8a* when *mbIC* was overexpressed. (\* $P < 0.05$ , \*\* $P < 0.01$ , \*\*\* $P < 0.001$ ). Error bars are standard deviations.

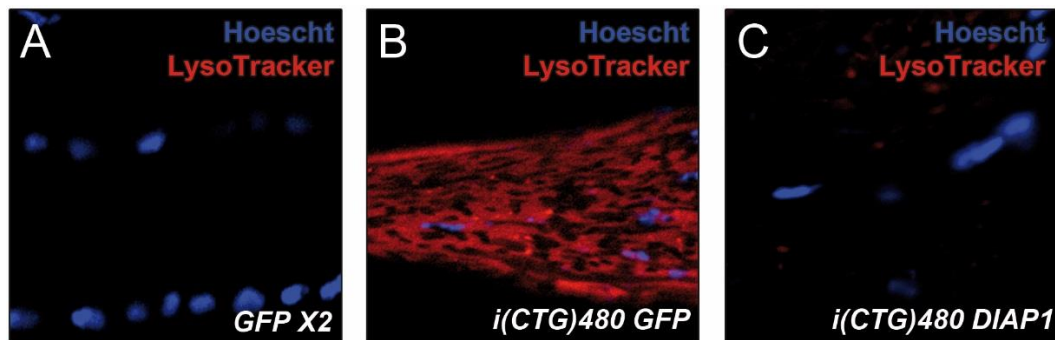

**Figure S3 *DIAP1* overexpression in model flies reduces autophagy.** Confocal fluorescence images of *Drosophila* IFM. Staining with LysoTracker (red) denotes that coexpression of *DIAP1* and *i(CTG)480* (*hs-Gal4 UAS-i(CTG)480>UAS-DIAP1*; C) results in autolysosome staining decrease when compared to DM1 model flies (*hs-Gal4 UAS-i(CTG)480>UAS-GFP*; B) to almost control levels (*hs-Gal4>UAS-GFP UAS-GFP*; A). Nuclei were counterstained with Hoechst (blue).

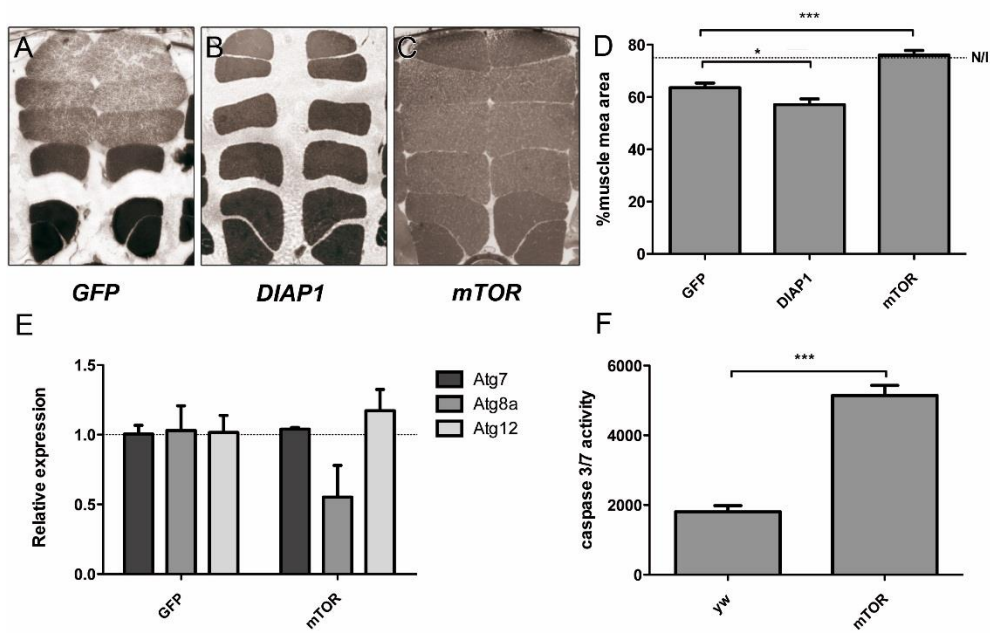

**Figure S4. *DIAP1* or *mTOR* overexpression produces opposite effects on IFM muscle area in heat shocked wild type flies.** (A-C) Sections of resin-embedded thoraces of flies of the indicated genotypes under the control of the *hs-Gal4* driver. The overexpression of *DIAP1* negatively affected muscle area whereas *mTOR* increased muscle area to values comparable to uninduced fly muscles (N/I) of control flies. (D) The quantification of mean muscle area confirmed that the differences were statistically significant. (E) The q-PCR analysis revealed that *mTOR* overexpression (*hs-Gal4*>*UAS-mTOR*) had no effect on autophagy-related gene expression, however, (F) Caspase 3/7 activity was dramatically increased. Statistically significant differences are denoted by asterisks (\* $P$ <0.05, \*\*\* $P$ <0.001). Graphs show means  $\pm$  s.e.m.

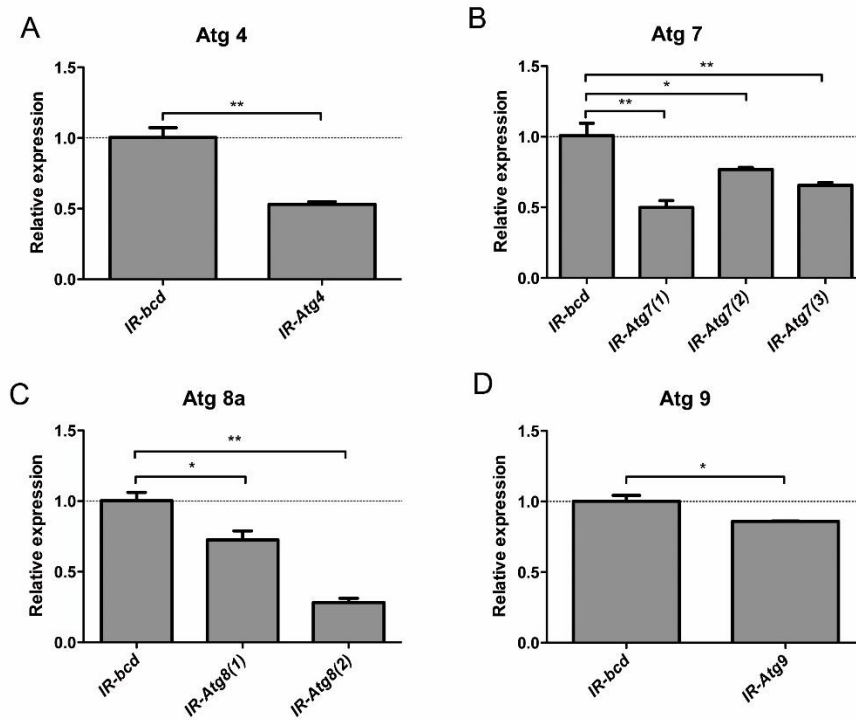

**Figure S5. Quantification of relative expression levels of Atg genes upon expression of the indicated RNAi lines.** Statistically significant differences are denoted by asterisks (\* $P < 0.05$ , \*\* $P < 0.01$ , \*\*\* $P < 0.001$ ). Error bars are standard deviations.

**Table S1.** Skeletal muscle biopsies from DM1 patients and unaffected controls.

| Patients |     |                    |                     | Controls |     |
|----------|-----|--------------------|---------------------|----------|-----|
| Gender   | Age | CTG expansion (kb) | MIRS <sup>(1)</sup> | Gender   | Age |
| Male     | 51  | 3                  | 3                   | Male     | 58  |
| Male     | 29  | 2                  | 2                   | Male     | 48  |
| Male     | 28  | 0.3                | 2                   | Male     | 31  |
| Male     | 27  | 1.1                | 1                   | Male     | 31  |
| Male     | 27  | 0.75               | 2                   | Male     | 24  |
| Male     | 20  | 1                  | 3                   | Male     | 25  |

(1) Muscular Impairment Rating Scale according to Mathieu, J. (1)

**Table S2.** Sequence and melting temperature (T<sub>m</sub>) of PCR primers used for standard and quantitative PCR.

| Primer pair   | Forward (5'→3')           | T <sub>m</sub> (°C) | Reverse (5'→3')           | T <sub>m</sub> (°C) |
|---------------|---------------------------|---------------------|---------------------------|---------------------|
| <i>UAS</i>    | GGAAAGTCCTTGGGGTCTTC      | 54                  | GGAAGTGAATGGGAGCA         | 52                  |
| <i>GAL4</i>   | CACCGACGCTAATGATGTTG      | 52                  | TTTGTTTTCTGCCTCCACTG      | 54                  |
| <i>Atg4</i>   | GCGCTCTTCGAGATCAGTCA      | 65                  | CCTGCCGCTCTCTTCAACTA      | 65                  |
| <i>Atg7</i>   | CATAGCCTGTTTCAGCGGCCGT    | 71                  | CCGCTTGAATTCGGAGATTCCCCTG | 70                  |
| <i>Atg8a</i>  | ATCCAGACCGTGTGCCCGTCAT    | 74                  | ACCGACGGTCAGGTCGGAAGG     | 74                  |
| <i>Atg9</i>   | CCACATCGAGGACCTTGACTC     | 60                  | CCACTACAATCACTGTGAATCCG   | 65                  |
| <i>Atg12</i>  | TCGATGCCAGCGAGCAAATTTTCCT | 70                  | GCCCCACGCCTGATTCTTGCA     | 72                  |
| <i>Rp49</i>   | ATGACCATCCGCCAGCATAAC     | 55                  | ATGTGGCGGGTTCGCTTGTTT     | 55                  |
| <i>AKT1S1</i> | AGCCACAGAGACAGAGACC       | 58                  | CGTCCTCATCCATCACAAG       | 58                  |
| <i>AKT2</i>   | CTCACACAGTCACCGAGAGC      | 58                  | TGGGTCTGGAAGGCATACTT      | 58                  |
| <i>ATG9A</i>  | TTTGCTCAGATGGATGTTTCG     | 58                  | TCCTCAGCTTGCTGGTACTT      | 59                  |
| <i>BCL2</i>   | CACCTGTGGTCCACCTGAC       | 58                  | CTGGACATCTCGGCGAAG        | 59                  |
| <i>BIRC7</i>  | CCGGTCAAAGGAAGAGACTT      | 58                  | TGCGTCTCCGGTTCTTC         | 58                  |
| <i>GAPDH</i>  | AGCCACATCGCTCAGACAC       | 58                  | CGCCAATACGACCAAT          | 58                  |
| <i>LAMP2</i>  | AATGGCACAGTGAGCACAAA      | 59                  | GAGATGGCACAGTGGTGTGT      | 58                  |
| <i>mTOR</i>   | TGCTGGAAGCCTTTGTCTATG     | 59                  | CGCTTGTTCCTTTGGTATT       | 59                  |
| <i>NKX3-2</i> | GGTGGGGTTTTCCCTGAG        | 59                  | GAAATTCTGAGGATTCAGGCTATG  | 59                  |
| <i>VPS52</i>  | CGGCTCCGGGTCAAGG          | 62                  | CTTCTGGAGGATAAACTCTCGGAT  | 60                  |
| <i>VPS37</i>  | CAGAAGCAAAGCTGGAGA        | 58                  | TCCACCTGCAGAAGGTCTAAC     | 59                  |

1 Mathieu, J., Boivin, H., Meunier, D., Gaudreault, M. and Begin, P. (2001) Assessment of a disease-specific muscular impairment rating scale in myotonic dystrophy. *Neurology*, 56, 336-340.
